# Supplementary material
Source: PubMed Central journal article supplement (PMC9255947)
Supplement: mmc1.pdf [file mmc1.pdf]

# THE LANCET

## Infectious Diseases

### Supplementary appendix

This appendix formed part of the original submission and has been peer reviewed. We post it as supplied by the authors.

Supplement to: Herman GA, O'Brien MP, Forleo-Neto E, et al. Efficacy and safety of a single dose of casirivimab and imdevimab for the prevention of COVID-19 over an 8-month period: a randomised, double-blind, placebo-controlled trial. *Lancet Infect Dis* 2022; published online July 5. [https://doi.org/10.1016/S1473-3099\(22\)00416-9](https://doi.org/10.1016/S1473-3099(22)00416-9).

**Efficacy and safety of a single dose of casirivimab and imdevimab for the prevention of COVID-19 over an 8-month period: a randomised, double-blind, placebo-controlled trial**

**SUPPLEMENTARY APPENDIX**

## Table of Contents

|                                                                            |    |
|----------------------------------------------------------------------------|----|
| Covid-19 Phase 3 Prevention Trial Team (REGN 2069/CoV-2 3502).....         | 4  |
| Study Sites and Investigators .....                                        | 4  |
| Regeneron Study Team.....                                                  | 14 |
| NIAID/CoV-2 Team .....                                                     | 16 |
| Supplementary Methods .....                                                | 17 |
| Statistical methods .....                                                  | 17 |
| Sample size calculation.....                                               | 17 |
| Analysis sets.....                                                         | 17 |
| Pharmacokinetic methods .....                                              | 18 |
| Sample collection and analysis .....                                       | 18 |
| Population pharmacokinetics .....                                          | 18 |
| Estimated 50% neutralization titers .....                                  | 19 |
| Supplementary Results.....                                                 | 20 |
| RT-PCR–confirmed SARS-CoV-2 infections regardless of serostatus.....       | 20 |
| Symptomatic SARS-CoV-2 infection.....                                      | 20 |
| Any SARS-CoV-2 infection (symptomatic or asymptomatic) .....               | 20 |
| Supplementary Figures .....                                                | 21 |
| Figure S1: Schematic overview of the study design.....                     | 21 |
| Figure S2: Flow diagram for the SARS-CoV-2 RT-PCR–negative population..... | 22 |

|                                                                                                                                                                                                                       |    |
|-----------------------------------------------------------------------------------------------------------------------------------------------------------------------------------------------------------------------|----|
| Supplementary Tables.....                                                                                                                                                                                             | 23 |
| Table S1: Summary of COVID-19 vaccination in SARS-CoV-2 RT-PCR–negative and seronegative participants.....                                                                                                            | 23 |
| Table S2: Demographics and baseline characteristics in SARS-CoV-2 RT-PCR–negative participants regardless of serostatus .....                                                                                         | 24 |
| Table S3: Proportion of participants who had a SARS-CoV-2–related medically attended visit during the 8-month study .....                                                                                             | 25 |
| Table S4: Treatment-emergent adverse events $\geq 2\%$ in any study group during the 8-month study by baseline serology status.....                                                                                   | 26 |
| Table S5: Serious treatment-emergent adverse events during the 8-month study.....                                                                                                                                     | 27 |
| Table S6: Population PK predicted concentration of casirivimab and imdevimab combined in serum and estimated 50% neutralizing titer (NT <sub>50</sub> ) over time following a single 1200-mg SC dose of CAS+IMD ..... | 29 |
| References.....                                                                                                                                                                                                       | 30 |

## **Covid-19 Phase 3 Prevention Trial Team (REGN 2069/CoVPN 3502)**

### **Study Sites and Investigators**

**Adolescent & Young Adult Research at Core – NIAID CoVPN, Chicago, IL:** Sybil Hosek, Monica Mercon, Temitope O. Oyedele, Vanessa Sarda

**Advanced Pulmonary Research Institute, Loxahatchee, FL:** Neal R. Warshoff, Liudmila Moreiras

**AGA Clinical Trials, Miami, FL:** Dario D. Altamirano, Roberto Aguirre, Dickson A. Ellington, Marie X. Graber, Patricia J. Bedoya, Jenny Daza, Barbara Colmenares, Paola Diaz, Yadira Zamora, Gilda Salazar

**AMR-Knoxville (formerly NOCCR), Knoxville, TN:** William B. Smith, Richard L. Gibson, Katherine Buckner, Jennifer Winbigler, Elizabeth Parker

**Ardmore Medical Research, Winston-Salem, NC:** Robert D. Rosen, Amy C. Sapp

**Arizona Liver Health, Tucson, AZ:** Anita Kohli, Vicki McIntyre, Yessica R. Sachdeva, Ashley Carney

**Arizona Liver Health, Chandler, AZ:** Yessica R. Sachdeva, Anita Kohli, Dina Gibson, Victorine Ekoko

**Ark Clinical Research, Long Beach, CA:** Kenneth T. Kim, Martha G. Navarro, Nayna Paryani, Lisa Ann Neinchel, Amber Mottola, Jason J. Ahn, Ellen Garibaldi, Apinya Vutikullird

**Atella Clinical Research, La Palma, CA:** Rafaelito S. Victoria, Xanthe Victoria, Rene Uong

**Atrium Health, Charlotte, NC:** Mindy Sampson, Lisa Davidson, Michael Leonard, Lewis McCurdy, Leigh A. Medaris, Christopher Polk, Zainab Shahid

**Avera McKennan Hospital and University Health Center, Sioux Falls, SD:** Jawad Nazir, Amy J. Elliott, John H. Lee

**Beth Israel Deaconess Medical Center, Boston, MA:** Kathryn Stephenson, Boris D. Juelg, Chen S. Tan, Rebecca Zash, Jessica Ansel, Kate Jaegle, Ai-ris Collier

**Bio-Medical Research, LLC, Miami, FL:** Lilia Roque-Guerrero, Javier Capote, Ana M. Gomez-Ramirez, Gisel Paz

**Boston Medical Center Ped. HIV Program NICHD – NIAID CoVPN, Boston, MA:** Michael K. Paasche-Orlow, Julien J. Dedier

**California Medical Research Associates, Northridge, CA:** Sanjay Vadgama, Ramachandra Patak, Kanchana Karunaratne

**Cardiology Care Clinics, Eatonton, GA:** Nicolas A. Chronos, Cristina Brehob, Michelle M. Lamm

**Carolina Institute for Clinical Research, Fayetteville, NC:** Nafisa Saleem, Judith Borger, Lindsey M. Carswell, Ryan P. Starr, Benjamin F. King, Scott N. Syndergaard, Ifeanyi I. Momodu

**Carolina Medical Research, Clinton, SC:** Nancy L.S. Patel, Britney Fuller, Dustin B. Morris, Janice P. Morris, Morgan Gibbs, Ravikumar K. Patel, Ryan Sattar

**Catalina Research Institute, Montclair, CA:** Rizwana H. Mohseni, Cecilia Soriano Casaclang, Sheila De Jesus-Maranan

**Centex Studies, Lake Charles, LA:** Michael K. Seep, Celeste Brown, Joshua A. Whatley

**Chicago Clinical Research Institute, Chicago, IL:** Dennis J. Levinson, Azazuddin Ahmed, Saad Alvi, Norman M. James, Anne Kuehl

**ClinCloud, LLC, Maitland, FL:** Esteban Olivera, Mayra Abreu, Jessica Branning, Emily Schirtzer, Landon Estes, Valery Crespo-Matos, Jawad Alqerem, Matthew Barnes

**Clinical Research of Central Florida, Winter Haven, FL:** Robinson Koilpillai, Eduardo Torres, Stephanie Cassady, Jennifer Cox, Jennel Smith, Jamie Rodriguez, Shanta Morris-Ossinac, Marty J. Fisher, Andrew Layman, Carlandra Randolph-Pauling, Shelley Johnson, Justin G. Joseph, Sandra Gagnon

**Clinical Trials of Florida, LLC, Miami, FL:** James P. Krainson, Mailin Diaz, Odalis Moreno, Mark J. Rosenthal, Maria G. Stanbury, Maggie Yasona, Ana T. Marquez, Guido Elias, Bridget Perez, David Marquez, Alison Only, Regina Jones

**Crossroads Clinical Research, Corpus Christi, TX:** Michael G. Winnie, Richard H. Leggett, Omesh Verma

**DM Clinical Research/BFHC Research, San Antonio, TX:** Ramon G. Reyes, Keith Beck, Brian D. Poliquin

**DM Clinical Research/LinQ Research, LLC, Pearland, TX:** Murtaza Mussaji, Jignesh Shah  
**East Coast Institute for Research, Jacksonville, FL:** David R. Sutton, Gloria R. Rodel, Kelly A. Stacey, Amy N. Dennis-Saltz, Mae Sheikh-Ali, Elias N. Saikali, James S. Magee, Rebecca F. Goldfaden, Stephanie M. Niman

**Epic Medical Research, Red Oak, TX:** Haresh D. Boghara, Bari Eichelbaum, Sunny Patel, Josie V.A. Quemado

**Excel Clinical Research, Las Vegas, NV:** Duane C. Anderson, Sean Su, Alexander F. Akhavan, Diana Kirby, Joy Venglik, Crista Fedora

**Fenway Health – NIAID CoVPN, Boston, MA:** Kenneth H. Mayer, Shea Buckley, Janet Dargon-Hart, Julian Dormitzer, Julia G. Fleming, Marcy S. Gelman, Johnathon Holmes, Taimur Khan, Jessica Kraft, Douglas Krakower, Patrick MacDonald, Rafael Ruiz-Martinez, Brooke A. Travis, Rossi Fish, Kavya Elangovan

**Florida Pulmonary Research Institute, LLC, Winter Park, FL:** Faisal A. Fakhri, Fernando S. Alvarado, Faisal M. Fakhri, Jose Diaz, Daniel T. Layish

**FOMAT Medical Research, Oxnard, CA:** Augusto E. Focil, Griselda Rosas, Michael Bogseth, Stevan Correa

**Future Innovative Treatments, LLC, Colorado Springs, CO:** Bhaktasharan C. Patel, Gary Tarshis, Katrina Grablin, Keyur J. Patel, Naresh Nekarani

**Geisinger Medical Center, Danville, PA:** Paul F. Simonelli, Stanley Martin, Alvin Sharma, Anna Chen, Diane Mills, Paula Nicoletto, Marilee Manganiello, Rebecca Mack, Kay Reiner, Elizabeth Deetz, Pragma Dhaubhadel, Shaeesta Khan, Sreelatha Naik, Sudheer Penupolu, Thulashie Sivarajah, Tae-Sung Kwon, Michelle Kopfinger, Penny Gingrich, Lakshmi Saladi, Karen Coleman

**Geisinger Wyoming Valley, Wilkes-Barre, PA:** Paul F. Simonelli, Stanley Martin, Alvin Sharma, Anna Chen, Diane Mills, Paula Nicoletto, Marilee Manganiello, Rebecca Mack, Kay Reiner, Elizabeth Deetz, Pragma Dhaubhadel, Shaeesta Khan, Sreelatha Naik, Sudheer Penupolu, Thulashie Sivarajah, Tae-Sung Kwon, Michelle Kopfinger, Penny Gingrich, Lakshmi Saladi, Karen Coleman

**Harlem Hospital Center – New York City Health and Hospitals Corporation, Harlem, NY:** Farbod Raiszadeh, Khaing T. Myint, Akari Kyaw, Donna Dowie, Robin O'Reilly, Lovelyamma Varghese, Simona Bratu, Hussein Assallum, Anya T. Weerasinghe, Raji Ayinla, Sharon Mannheimer

**Harlem Prevention Center – NIAID CoVPN, Harlem, NY:** Ellen Morrison, Julie C. Franks, Avelino Loquere, Andrea Low, Sharon Mannheimer, Joan Villacruz, Orlando Rosario

**Healthcare Research Network, Hazelwood, MO:** Larry D. Reed, Oscar Lin, Lyndsay Goeke, Brian Springer, Joseph Velikis

**Henry Ford Health System, Detroit, MI:** Mayur S. Ramesh, George Alangaden

**Holy Name Medical Center, Teaneck, NJ:** Suraj Saggar, Benjamin De La Rosa, Erina Kunwar, Thomas Birch, Karyna Neyra

**IACT Health, Columbus, GA:** Joseph Surber, Jeffrey Kingsley, April Pixler, Andrea Thompson-Davis

**Icahn School of Medicine at Mount Sinai, New York, NY:** Judith A. Aberg, Michelle Cespedes, Alexandra Abrams-Downey, Erna Kojic, Luz Lugo, Nadim Salomon, Sean Liu, David Perlman, Deena Altman, Sondra Middleton, Farah Rahman, Helen M. Seedhom, Georgina Osorio, Joseph Mathew, Sanjana Koshy, Dana S. Mazo, Francesca Cossarini, Janet Forcht, Alina Jen, Kiwan Stewart, Edna Leiva-Ortiz, Angela Lomax, Karla Mondejar, Erika Maria M.R. Schwarz, Tarashon Broomes

**Innovative Research of West Florida, Clearwater, FL:** Miguel E. Trevino, Timothy L. Light, Benjamin R. DeVries

**Lincoln Medical Center – New York City Health and Hospitals Corporation, Bronx, NY:** Vidya P. Menon, Usha Venugopal, Moiz Kasubhai, Anjana Pillai, Paola Carugno, Daniel Sittler



**M3 Wake Research, Raleigh, NC:** Matthew H. Hong, Wayne L. Harper, Lynn G. Eckert, Lisa M. Cohen, Douglas A. Wadeson

**Maryland School of Medicine, Baltimore, MD:** Joel V. Chua, Richard G. Wilkerson, John W. Baddley, Jennifer S. Husson, Shivakumar Narayanan, Uzoamaka Eke, Myint Noe, Melanie Malave-Sanchez

**Massachusetts General Hospital – ID Clinical Research Unit – NIAID CoVPN, Boston, MA:** Arthur Y. Kim, Rajesh T. Gandhi, Kristen Hysell, Jacob Lazarus, Lael Yonker, Gregory K. Robbins

**McGovern Medical School at The University of Texas Health Science Center, Houston, TX:** Roberto C. Arduino, Karen J. Vigil, Damian A. Chiandussi, Jonatan E. Gioia, Romina C. Collahua, Netanya Utay, Sarah Duong, Maria Martinez, Francesca Vigevano

**Medical Research of Westchester, Miami, FL:** Richard Perez-Perez, Carlos J. Bello, Jorge L. Acosta, Esperanza Arce-Nunez, Julio L. Arronte

**Medical University of South Carolina, Charleston, SC:** Eric G. Meissner, Andrew J. Goodwin, Deeksha Jandhyala, Nandita R. Nadig

**MedPharmics, Metairie, LA:** Robert Jeanfreau, Shiva Akula, Nicole D. Gutierrez, Katelyn A. Jackson, Susan Jeanfreau, Andrea F. Jeanfreau, Kynisha N. Johnson, RaeShanta O. McKendall, Paul H. Neff, Melissa H. Spedale, Susan C. Tortorich

**MedPharmics, Gulfport, MS:** Paul G. Matherne, Donald Gaddy, Melissa Benke, Heather Lambert, Lindsay Huckabee, Tiffany Payne, Jessica Stahl, Amy Caldwell, Sarah Bowen, Cassandra Beeks, Connie Richardson, Tiffany Reffit

**META Medical Research Institute, Dayton, OH:** Priyesh Mehta, Jacqueline N. Horne, Grace O. Hassan

**Midland Florida Clinical Research Center, Deland, FL:** Godson I. Oguchi, Judepatricks M. Onyema, Krystie Williams

**Midway Immunology and Research Center, Fort Pierce, FL:** Moti N. Ramgopal, Brenda L. Jacobs

**National Institute of Infectious Diseases, Bucharest, Romania:** Oana Sandulescu, Adrian Streinu-Cercel, Anca Streinu-Cercel, Daniela Manolache, Ana Blaranu, Monica Stoica, Ana-Maria Andone, Daniela Dospinoiu, Silviu A. Serban, Loredana F. Patru, Cristina Buhoara, Ramona Dorobantu, Ioanna A. Daramus, Madalina Irimia, Magdalena I. Pechianu, Liliana Cavaropol

**New Jersey Medical School Clinical Research Center – NIAID CoVPN, Newark, NJ:** Amesika N. Nyaku, Christie Lyn Costanza, Christina Daliani, Rondalya Deshields, Jared Khan, Mario Portilla, Susana Rivera, Shobha Swaminathan

**New York University Langone Vaccine Center – NIAID CoVPN, Manhattan, NY:** Angelica C. Kottkamp, Anna Bershteyn, Tamia Davis, Mark J. Mulligan, Vanessa N. Raabe

**Next Level Urgent Care, Houston, TX:** Terence M. Chang, Robbyn Traylor, Lenee Gordon, John McDivitt, Lizette Castro, Wilner E. Jeudy

**Northern California Research, Sacramento, CA:** Douglas Young, Gary Carson, Stacy Woodward, Jesika Riley, Karla Alay, Laurie Johnson

**Ohio State University AIDS Clinical Trials Unit – NIAID CoVPN, Columbus, OH:** Seuli Brill, Vignesh Doraiswamy, Mahrous Abo Hassan, Susan Koletar, Carlos Malvestutto, Taru Saigal, Mohammad M. Sobhanie, Jeremy Young

**Orlando Immunology Center, Orlando, FL:** Edwin DeJesus, Federico Hiestrosa, Charlotte-Paige M. Rolle, Stephanie Skipper, Dan Cruz, Terry Wilder, Jeffrey Garrett

**Paradigm Clinical Research Institute, Torrance, CA:** Ramprasad Dandillaya, Kartik Ananth

**PCP for Life, Houston, TX:** Rajasekaran Annamalai, Huy Nguyen, Nizar Nayani, Mahalakshmi Ramchandra

**Penn Prevention – NIAID CoVPN, Philadelphia, PA:** Ian Frank, Eileen Donaghy, Debora Dunbar, Helen Koenig, Michele Wisniewski

**PMG Research of McFarland Clinic, Ames, IA:** Jennifer A. Killion, Rupal Amin, Shauna Basener, Erin Hackett, Catherine Lawrence, Rondi Leedom, Jessica Melton

**PMG Research of Wilmington, Wilmington, NC:** Kevin D. Cannon, Meshia M. Chadwick

**Oway, Hialeah, FL:** Oscar G. Galvez, Fausto Castillo

**Regional One Health, Memphis, TN:** John Jefferies, Natalie Dunlap, Aneel Kumar, Nate G. Rogers, Amber Thacker Daniel Wells, Abdallah Azouz, Deidre James

**Remington-Davis, Columbus, OH:** Edward M. Cordasco, Heather Lee, Brian R. Zeno

**Republican Clinical Hospital, Chisinau, Moldova:** Natalia Gaibu, Victor Alexandru Botizatu, Angela Coltuclu, Daniel Mindrila, Nelea Ghicavii, Dinu Condrea, Oxana Bujor, Sergiu Iacob, Rodica Usatii, Stela Vudu, Aristia Seremet

**The Miriam Hospital, Providence, RI:** Eleftherios Mylonakis, Ralph Rogers, Dimitrios Farmakiotis, Jennie E. Johnson, Joseph Garland, Franciene R. Touzard Karen Tashima, Natasha Rybak

**Ruane Clinical Research Group, Los Angeles, CA:** Peter J. Ruane, Peter R. Wolfe, Kenny Trinidad, Lucy Reynell, Dani Ain, Emma Clark, Gabriel Faith, Odette Ibarra, Isaac Berlin

**Rush University Medical Center, Chicago, IL:** James Moy, Sindhura Bandi, Beverly Sha, Dina Naquiallah, Jun Fu, Amy Gosha, Grace Li, Ayesan Rewane, Neumann Jordan

**San Francisco Research Institute, San Francisco, CA:** Mark J. Savant, Edna Yee

**Sarasota Memorial Hospital, Sarasota, FL:** Manuel Gordillo, Annette Artau, Rishi Bhattacharyya, Natan Kraitman, Julie A. Larkin, Rabih H. Loutfi, Roberto A. Mercado, Michael W. Milam, Lenka Offner, Sudha Tallapragada, Kirk G. Voelker, Michael Lowry, Sarah Temple

**SignatureCare Emergency Center – Memorial City, Houston, TX:** Alan W. Skolnick, Todd M. Price, Harold S. Minkowitz, David G. Leiman, Isidoro Wiener, Anatoli N. Krasko

**SignatureCare Emergency Center – TC Jester, Houston, TX:** Alan W. Skolnick, Todd M. Price, Harold S. Minkowitz, David G. Leiman, Anatoli N. Krasko, Isidoro Wiener

**Stanford University, Palo Alto, CA:** Jason R. Andrews, Upinder Singh, Yvonne Maldonado, Chaitan Khosla

**St. Hope Foundation, Bellaire, TX:** James Sims III, Manuel O. Vasquez, Kenneth Degazon, Katherine Asuncion

**Tampa General Hospital, TGH Family Care Network Healthpark, Tampa, FL:** Kami Kim, Charurut Somboonwit, Asa Z. Oxner, Jason Wilson, Tiffany Vasey, Lucy Guerra, Susannah Hall, Erin Patterson, Kari Carrieri

**Tandem Clinical Research, Marrero, LA:** Adil A. Fatakia, Gary Reiss, Marissa L. Miller, Kristen Clinton Muller

**The Hope Clinic of Emory University – NIAID CoVPN, Decatur, GA:** Srilatha Edupuganti, Cassie Grimsley Ackerley, Alexis E. Ahonen, Katherine M. Al-Haroun, Alicarmen Alvarez, Easton Beshears, Jennifer Breiman, Rebecca Byram, Matthew H. Collins, Sharon Curate-Ingram, Renata L. Dennis, Rebecca Fineman, Geoffrey Kamau, Colleen Kelley, Shashikala Nagar, Shivan Patel, Varun Phadke, Nadine Rouphael, Michele Wiles, Daniel S. Graciaa, Carla N. Cooke

**The Lundquist Institute, Torrance, CA:** Loren G. Miller, Timothy Hatlen

**The Ponce de Leon Center Clinical Research Site – NIAID CoVPN, Atlanta, GA:** Michael Chung, Colleen Kelley, Valeria Cantos, Paulina Rebolledo, Anandi Sheth, Rotrease Regan, Carlos del Rio, Sheetal Kandiah, Caitlin A. Moran

**Triple O Research Institute PA, West Palm Beach, FL:** Olayemi O. Osiyemi, Jose Menajovsky-Chaves, Christina Campbell, Stephanie Martinez, Alexandra Vargas

**Tufts Medical Center, Boston, MA:** Andrew M. Strand, Debra D. Poutsiaka, Brian Chow, Roberto V. Colindres, Helen Boucher, Jennifer Chow, Mary Hopkins, Whitney Perry, Jose Caro, Yoav Golan, Tine Vindenes, Cheleste Thorpe, Laura Kogelman, Jeffrey Griffith, Rakhi Kohli, Paula Dabenigno, Vidya Iyer, Bipin Malla, Saba Mostafavi, Christian A.C. Guerra, Carlos Mendoza, Andreas Klein, Danial Castro

**Tulane University School of Medicine, New Orleans, LA:** Dahlene N. Fusco, Christine Bojanowski, Joshua Denson, Arnaud Drouin, Emily Duffy, Cynthia Moreau, Jerry Zifodya

**University at Buffalo, State University of New York, Buffalo, NY:** Sanjay Sethi, Brian Clemency, Rajesh Kunadharaju

**Universal Medical and Research Center, LLC, Miami, FL:** Gerard F. Acloque, Agustin Martinez, Harold Iparraguirre, Kristina Reyes

**University of Arizona, Tucson, AZ:** Sairam Parthasarathy, Franz Rischard

**University of California Davis, Sacramento, CA:** Stuart Cohen, George Thompson, Hien H. Nguyen

**University of Cincinnati, Cincinnati, OH:** Carl J. Fichtenbaum, Moises Huaman Joo, Sharon D. Kohrs, Jaime Robertson, Sarah Trentman, Eva Whitehead, Linda Hinds, Jenifer Baer, Tamara Ward

**University of Colorado School of Medicine, Aurora, CO:** Eric A. F. Simões, Brian T. Montague, Rowena Crow, Erica Fredregil

**University of Illinois at Chicago Project WISH – NIAID CoVPN, Chicago, IL:** Jessica Herrick, Richard Novak, Mahesh C. Patel

**University of Miami - Miller School of Medicine, Miami, FL:** Gary I. Kleiner, Lilian M. Abbo, Bhavarth Shukla, Jennifer Gebbia, Maria Rodriguez, Chandrama Shrestha, Marianna Martini, Renzo Cifuentes

**University of Minnesota, Minneapolis, MN:** Anne-Marie Leuck, Mahsa Abassi

**University of Mississippi, Jackson, MS:** Luis S. Ciudad, Jose A. Lucar Lloveras, Leandro Mena, Nandi Utsav

**University of North Carolina, Chapel Hill, NC:** Jessica T. Lin, Faith Claman, Joseph J. Eron, William A. Fischer, Christopher Hurt, Matthew Newell, Susan Pedersen, Becky Straub, Kathleen Tompkins, David A. Wohl, Tom Belhorn, Miriam Chicurel- Bayard, Lisa Rahangdale, Marina Hendricks, Shawn Meysenburg, Alexander Bradley, Sara Schiffelbein

**University of Texas Health Science Center, Tyler, TX:** Julie Philley, Megan Devine

**University of Virginia, Charlottesville, VA:** William A. Petri, Jae H. Shin, Cirle A. Warren, Jennifer M. Sasson, Debbie-Ann T. Shirley, Chelsea Marie, Rebecca M. Carpenter, Gregory R. Madden, Cynthia S. Edwards, Elizabeth Brooks, Danielle Donigan, Rebecca Wade, Samantha B. Simmons, Jennifer Pinnata, Michelle Sutton, Igor Shumilin

**University of Washington Medical Center, Seattle, WA:** Ruanne V. Barnabas, Elizabeth C. Church, Michelle L. Karuna, Sharon K. Martens, Jeffrey B. Purcell, Bao-Chau Vo

**University of Wisconsin, Madison, WI:** William R. Hartman, Robert T. Striker, Joseph P. Connor, Kraig T. Kumfer

**Vanderbilt Vaccine Clinical Research Site – NIAID CoVPN, Nashville, TN:** Spyros A. Kalams, Gregory J. Wilson

**VitaLink Research, Gaffney, SC:** David R. Erb, Luis I. Delacruz, Supinder K. Channa, Kelly N. White, Tammy T. Pittman, Ashley E. Rochester, Wanda J. Pressley, Meredith G. Benfield, Amy Ford, Summer L. Allen

**Virginia Commonwealth University School of Medicine, Richmond, VA:** Michael S. Donnenberg, Marjolein de Wit

**Whitman-Walker Health – NIAID CoVPN, Washington, DC:** Sarah L. Henn, Megan Coleman, Alice Eggleston, Lynsay MacLaren, Koebele Carrington

**WR-ClinSearch, LLC, Chattanooga, TN:** Mark M. McKenzie, Teresa A. Deese, Richard H. Sadowitz

**WR-Mount Vernon Clinical Research, LLC, Sandy Springs, GA:** Benjamin D. Thomas, Stephen C. Blank, Laura A. Tsakiris, Ronald Mirenda, Lauren W. Jones

**Xera Med Research, Boca Raton, FL:** Anna Martin, Candace Kokaram, Ulyana Arzamasova, Gargi Gharat, Kristina Louissaint, Clement Partap, Maria Fernandez

**Xera Med Research, Miami, FL:** Anna Martin, Candace Kokaram, Ulyana Arzamasova, Gargi Gharat, Kristina Louissaint, Clement Partap, Maria Fernandez

## **Regeneron Study Team**

Achint Chani, Adebisi Adepou, Adnan Mahmood, Aisha Mortagy, Ajla Dupljak, Alina Baum, Alison Brown, Amy Froment, Andrea Hooper, Andrea Margiotta, Andrew Bombardier, Anita Islam, Anne Smith, Arvinder Dhillon, Audra McMillian, Aurora Breazna, Ayesha Aslam, Barabara Carpentino, Bari Kowal, Barry Siliverstein, Benjamin Horel, Bo Zhu, Bret Musser, Brian Bush, Brian Head, Brian Snow, Bryan Zhu, Camille Debray, Careta Phillips, Carmella Simiele, Carol Lee, Carolyn Nienstedt, Caryn Trbovic, Casey (Kuo-Chen) Chan, Catherine Elliott, Chad Fish, Charlie Ni, Christa Polidori, Christine Enciso, Christopher Caira, Christopher Powell, Christos A. Kyratsous, Cliff Baum, Colin McDonald, Cynthia Leigh, Cynthia Pan, Dana Wolken, Danielle Manganello, David Liu, David Stein, David M. Weinreich, Dawlat Hassan, Daya Gulabani, Deborah Fix, Deborah Leonard, Deepshree Sarada, Denise Bonhomme, Denise Kennedy, Devin Darcy, Dhanalakshmi Barron, Diana Hughes, Diana Rofail, Dipinder Kaur, Divya Ramesh, Dona Bianco, Donna Cohen, Eduardo Forleo-Neto, Edward Jean-Baptiste, Ehsan Bukhari, Eileen Doyle, Elizabeth Bucknam, Emily Labriola-Tomkins, Emily Nanna, Esther Huffman O'Keefe, Evelyn Gasparino, Evonne Fung, Flonza Isa, Fung-Yee To, Gary Herman, George D. Yancopoulos, Georgia Bellingham, Giane Sumner, Grainne Moggan, Grainne Power, Haixia Zeng, Hazel Mariveles, Heath Gonzalez, Helen Kang, Hibo Noor, Ian Minns, Ingeborg Heirman, Izabella Peszek, James Donohue, Jamie Rusconi, Janice Austin, Janie Parrino, Jeannie Yo, Jenna McDonnell, Jennifer D. Hamilton, Jessica Boarder, Jianguo Wei, Jingchun Yu, Joanne Malia, Joanne Tucciarone, Jodie Tyler-Gale, John D. Davis, John Strein, Jonathan Cohen, Jonathan Meyer, Jordan Ursino, Joseph Im, Joseph Tramaglino, Joseph Wolken, Kaitlyn Potter, Kaitlyn Scacalossi, Kamala Naidu, Karen Browning, Karen Rutkowski, Karen Yau, Katherine Woloshin, Kelly Lewis-Amezcu, Kenneth Turner, Kimberly Dornheim, Kit Chiu, Kosalai

Mohan, Kristina McGuire, Kristy Macci, Kurt Ringleben, Kusha Mohammadi, Kyle Foster, Latora Knighton, Leah Lipsich, Lindsay Darling, Lisa Boersma, Lisa Cowen, Lisa Hersh, Lisa Jackson, Lisa Purcell, Lisa Sherpinsky, Livia Lai, Lori Faria, Lori Geissler, Louise Boppert, Lyra Fiske, Marc Dickens, Marco Mancini, Maria C. Leigh, Meagan O'Brien, Michael Batchelder, Michael Klinger, Michael Partridge, Michel Tarabocchia, Michelle Wong, Mivianisse Rodriguez, Moetaz Albizem, Muriel O'Byrne, Ned Braunstein, Neena Sarkar, Neil Stahl, Nicole Deitz, Nicole Memblatt, Nirav Shah, Nitin Kumar, Olga Herrera, Oluchi Adedoyin, Ori Yellin, Pamela Snodgrass, Patrick Floody, Paul D'Ambrosio, Paul (Xiaobang) Gao, Peijie Hou, Philippa Hearld, Qin Li, Rachel Kitchenoff, Rakiyya Ali, Ramya Iyer, Ravikanth Chava, Rinol Alaj, Rita Pedraza, Robert Hamlin, Romana Hosain, Ruchin Gorawala, Ryan White, Ryan Yu, Rylee Fogarty, S. Balachandra Dass, Sagarika Bollini, Samit Ganguly, Sandra DeCicco, Sanket Patel, Sarah Cassimaty, Selin Somersan-Karakaya, Shane McCarthy, Sharon Henkel, Shazia Ali, Shelley Geila Shapiro, Somang Kim, Soraya Nossoughi, Stephanie Bisulco, Steven Elkin, Steven Long, Sumathi Sivapalasingam, Susan Irvin, Susan Wilt, Tami Min, Tatiana Constant, Theresa Devins, Thomas DiCioccio, Thomas Norton, Travis Bernardo, Tzu-Chien Chuang, Victor (Jianguo) Wei, Vinh Nuce, Vishnu Battini, Wilson Caldwell, Xiaobang Gao, Xin Chen, Yanmei Tian, Yasmin Khan, Yuming Zhao, Yunji Kim



**NIAID/CoVPN Team**

Bonnie Dye (CoVPN), Christopher B. Hurt (CoVPN), Dale R. Burwen (NIAID), Dan H. Barouch (CoVPN), David Burns (NIAID), Elizabeth Brown (CoVPN), Katharine J. Bar (CoVPN), Mary Marovich (NIAID), Meredith Clement (CoVPN), Myron S. Cohen (CoVPN), Nirupama Sista (CoVPN), Ruanne V. Barnabas (CoVPN), Sheryl Zwierski (NIAID)

## Supplementary Methods

### Statistical methods

#### *Sample size calculation*

The sample size calculation for this study has been previously described.<sup>1</sup> Briefly, approximately 1248 seronegative participants from 430 households (assuming an average household size of 2.9 participants) would provide greater than 90% power to detect a 50% relative difference in the risk of symptomatic COVID-19 infection (with an assumed 10% attack rate in the placebo group) over the 28-day efficacy assessment period at a two-sided alpha level of 0.05. With a 5% attack rate in the CAS+IMD group (i.e., a 50% relative risk reduction), this between-group difference is equivalent to an odds ratio of 0.47.

#### *Analysis sets*

The seronegative modified full analysis set utilised for efficacy analyses included all randomised participants  $\geq 12$  years of age who were confirmed by central laboratory testing to be negative for both SARS-CoV-2 by RT-PCR and serology at baseline, excluding participants from the initial descriptive assessment, as previously described.<sup>1</sup> Safety data are reported for all SARS-CoV-2 RT-PCR–negative participants who received study drug, irrespective of serostatus, including those in the initial descriptive assessment, as previously described.<sup>1</sup>

## **Pharmacokinetic methods**

### ***Sample collection and analysis***

Blood samples for measurement of casirivimab and imdevimab (CAS+IMD) concentrations in serum were collected and analysed as previously described.<sup>1</sup>

### ***Population pharmacokinetics***

Two population pharmacokinetic (PK) models with the same model structure were developed for casirivimab and imdevimab, based on an analysis dataset comprised of 3687 (casirivimab) and 3716 (imdevimab) participants from three Regeneron clinical studies (R10933-10987-COV-2067, NCT04425629; R10933-10987-COV-2069, NCT04452318; R10933-10987-COV-20145, NCT04666441). In brief, the population PK models for casirivimab and imdevimab are both 2-compartment models with linear elimination and first-order absorption following subcutaneous dosing. Stochastic simulations were performed to predict exposure metrics for participants receiving CAS+IMD. One-thousand virtual participants with an approximately equal number of male and females and mean (standard deviation) body weight of 83.6 (21.1) kg were generated by sampling complete covariate vectors for participants in the observed data. Population PK model parameters were fixed to the estimates from the final population PK models with inter-participant variability incorporated via simulated inter-individual random effects. A total of 1000 concentration-time profiles of casirivimab and imdevimab were generated for CAS+IMD dosing regimens (300 mg SC Q3M, 300 mg IV Q3M, 1200 mg SC Q5M, and 1200 mg IV Q5M); concentrations of casirivimab and imdevimab at each simulated timepoint were added to obtain

concentrations of casirivimab and imdevimab combined in serum (population PK manuscript in preparation).

***Estimated 50% neutralization titers***

The 50% neutralizing titer for CAS+IMD concentration combined in serum was calculated as the ratio of the population PK predicted concentration in serum over 8 monthly intervals to the *in vitro* concentration of CAS+IMD combined required to neutralise the SARS-CoV-2 virus by 50% (IC<sub>50</sub>; 2·83 ng/mL) for the D614G variant (population PK manuscript in preparation) using an S-protein expressing pseudovirus assay.<sup>2,3</sup>

## Supplementary Results

### RT-PCR–confirmed SARS-CoV-2 infections regardless of serostatus

#### *Symptomatic SARS-CoV-2 infection*

In an analysis that included all SARS-CoV-2 RT-PCR–negative participants at baseline regardless of baseline serostatus, there was a 79·7% risk reduction in symptomatic RT-PCR–confirmed SARS-CoV-2 infections with CAS+IMD versus placebo during the entire 8-month study (25/1174 [2·1%] and 120/1143 [10·5%], respectively; adjusted odds ratio (95% confidence interval [CI]), 0·19 (0·12–0·29); nominal  $p < 0·0001$ ).

#### *Any SARS-CoV-2 infection (symptomatic or asymptomatic)*

In an analysis that included all SARS-CoV-2 RT-PCR–negative participants at baseline regardless of serostatus, there was a 64·4% risk reduction in any RT-PCR–confirmed SARS-CoV-2 infections (symptomatic or asymptomatic) with CAS+IMD versus placebo during the entire 8-month study (72/1174 [6·1%] and 197/1143 [17·2%], respectively; adjusted odds ratio (95% CI), 0·31 (0·24–0·42); nominal  $p < 0·0001$ ).

## Supplementary Figures

Figure S1: Schematic overview of the study design

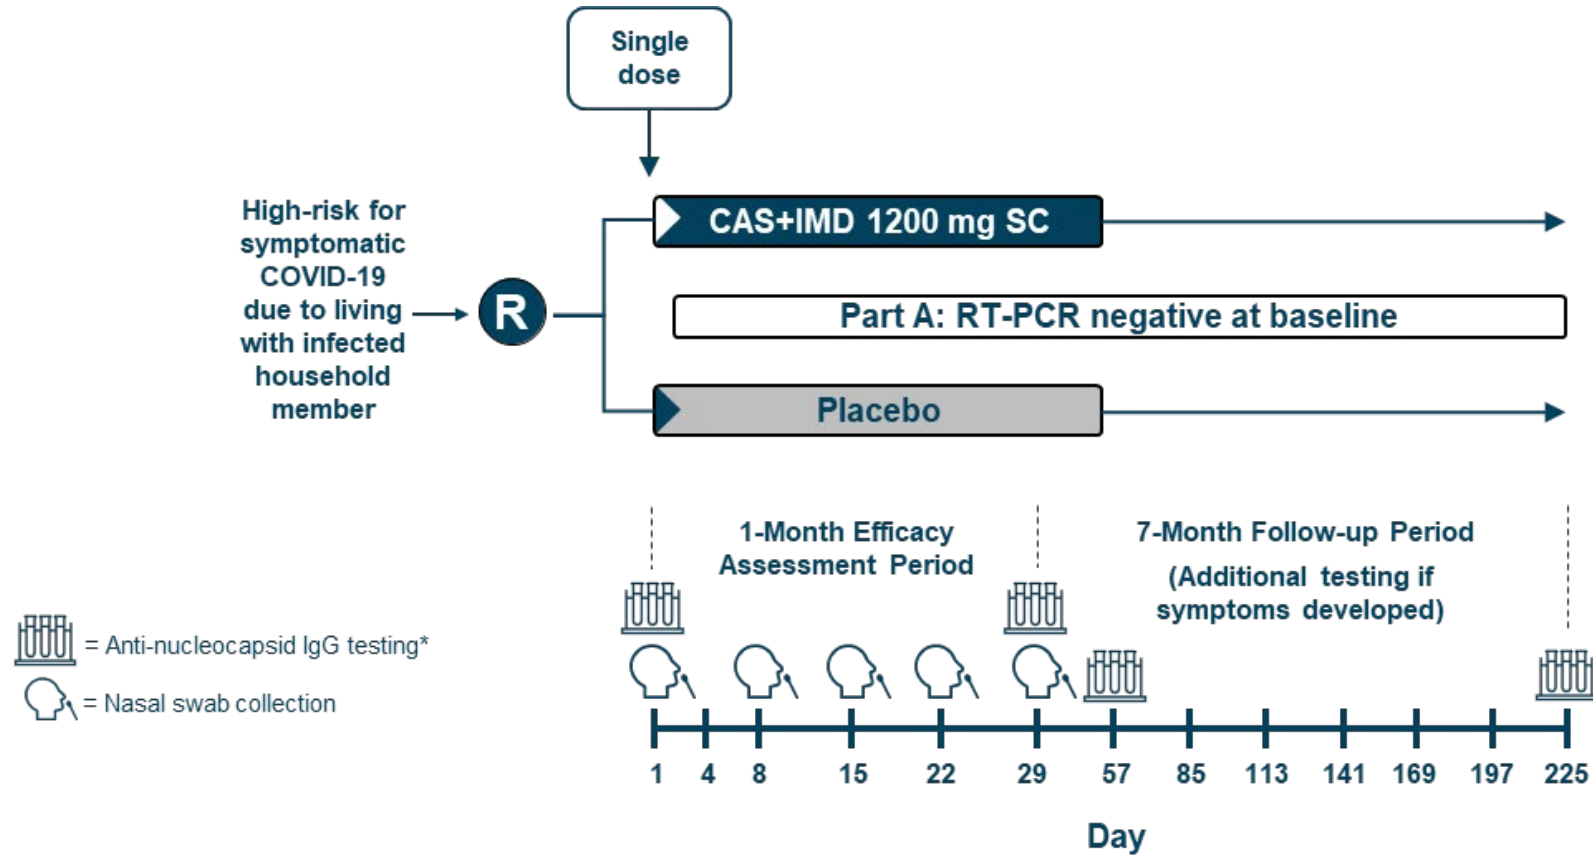

\*Baseline serologic testing also included anti-spike [S1] IgA and anti-spike [S1] IgG, in addition to anti-nucleocapsid IgG. CAS+IMD=casirivimab and imdevimab. RT-PCR=reverse transcription polymerase chain reaction. SC=subcutaneous.

**Figure S2: Flow diagram for the SARS-CoV-2 RT-PCR–negative population**

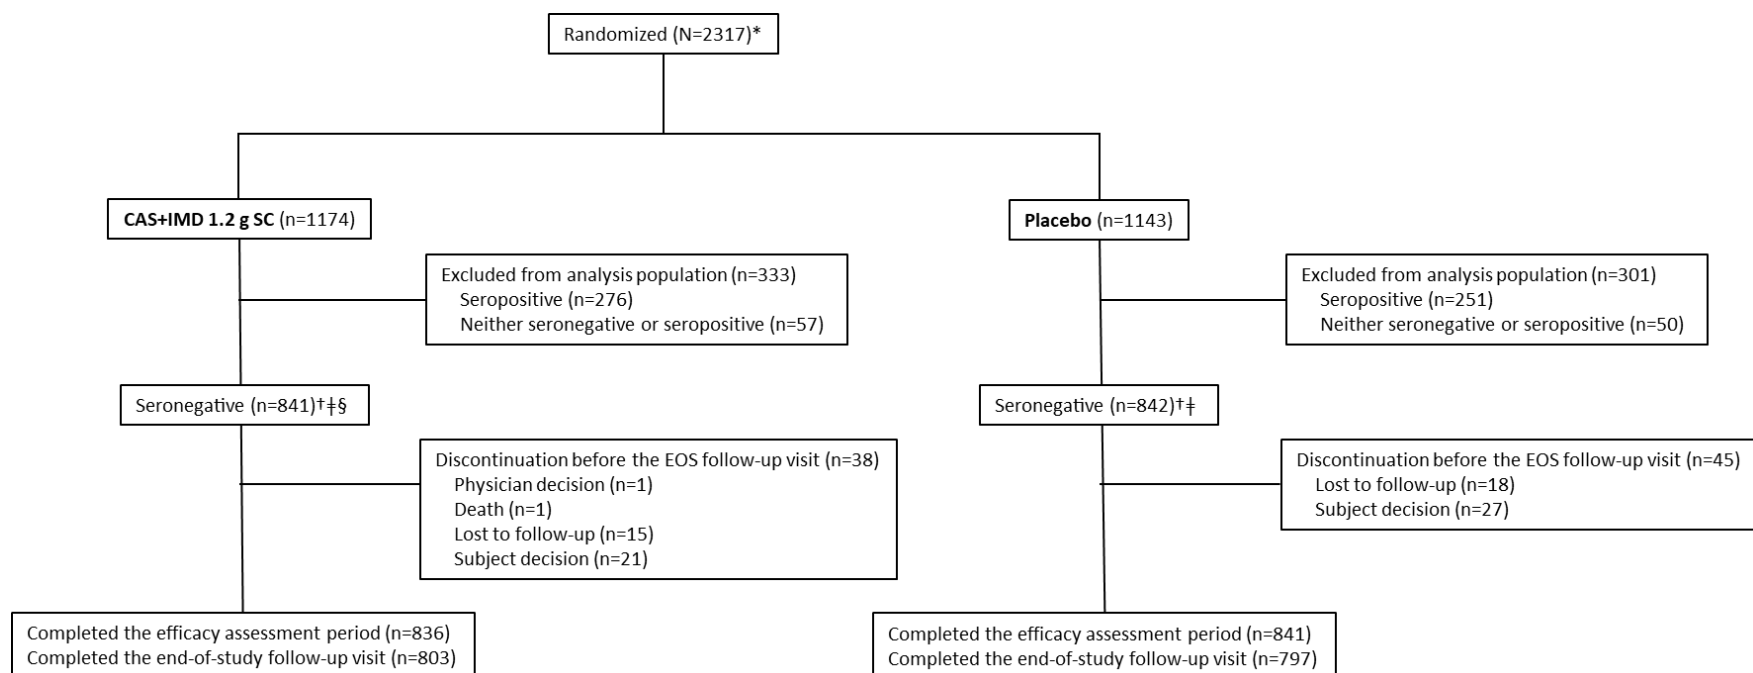

\*Excludes the 554 participants from the initial descriptive assessment for efficacy analyses; these participants were included in the safety analysis population (N=2867).

†A participant was categorised at baseline as seronegative if all available serologic tests (anti-spike [S1] IgA, anti-spike [S1] IgG, and anti-nucleocapsid IgG) were negative and as seropositive if any serologic test was positive.

‡This is the primary efficacy analysis population (seronegative mFAS-A).

§One participant was randomised but did not receive CAS+IMD; this participant was included in the primary efficacy analysis population (seronegative mFAS-A).

CAS+IMD=casirivimab and imdevimab. EOS=end of study. RT-PCR=reverse transcription polymerase chain reaction. SARS-CoV-2=severe acute respiratory syndrome coronavirus 2. SC=subcutaneous.

## Supplementary Tables

**Table S1: Summary of COVID-19 vaccination in SARS-CoV-2 RT-PCR–negative and seronegative participants\***

|                                                                                     | <b>CAS+IMD<br/>1200 mg SC<br/>(n=841)</b> | <b>Placebo<br/>(n=842)</b> | <b>Total<br/>(n=1683)</b> |
|-------------------------------------------------------------------------------------|-------------------------------------------|----------------------------|---------------------------|
| Time to first COVID-19 vaccination                                                  |                                           |                            |                           |
| n (%)                                                                               | 290 (34.5)                                | 296 (35.2)                 | 586 (34.8)                |
| Mean days (SD)                                                                      | 112.1 (44.71)                             | 112.7 (45.02)              | 112.4 (44.83)             |
| Median days (Q1:Q3)                                                                 | 108.5 (81.0:143.0)                        | 109.0 (85.0:145.0)         | 109.0 (82.0:145.0)        |
| During the efficacy assessment period ( $\leq$ 29 days since administration), n (%) | 9 (1.1)                                   | 7 (0.8)                    | 16 (1.0)                  |
| During follow-up ( $>$ 29 days since administration), n (%)                         | 281 (33.4)                                | 289 (34.3)                 | 570 (33.9)                |

\*Population includes participants who were SARS-CoV-2 RT-PCR–negative and seronegative at baseline, excluding participants from the initial descriptive assessment.

CAS+IMD=casirivimab and imdevimab. RT=reverse transcription polymerase chain reaction. SARS-CoV-2=severe acute respiratory syndrome coronavirus 2. SC=subcutaneous. SD=standard deviation.



**Table S2: Demographics and baseline characteristics in SARS-CoV-2 RT-PCR–negative participants regardless of serostatus\***

|                                     | <b>CAS+IMD<br/>1200 mg SC<br/>(n=1174)</b> | <b>Placebo<br/>(n=1143)</b> | <b>Total<br/>(n=2317)</b> |
|-------------------------------------|--------------------------------------------|-----------------------------|---------------------------|
| Age, years                          |                                            |                             |                           |
| Mean (SD)                           | 41·9 (15·88)                               | 42·1 (15·57)                | 42·0 (15·73)              |
| ≥50, n (%)                          | 411 (35·0)                                 | 404 (35·3)                  | 815 (35·2)                |
| Sex, n (%)                          |                                            |                             |                           |
| Male                                | 539 (45·9)                                 | 555 (48·6)                  | 1094 (47·2)               |
| Female                              | 635 (54·1)                                 | 588 (51·4)                  | 1223 (52·8)               |
| Race, n (%)                         |                                            |                             |                           |
| White                               | 990 (84·3)                                 | 962 (84·2)                  | 1952 (84·2)               |
| Black or African American           | 128 (10·9)                                 | 123 (10·8)                  | 251 (10·8)                |
| Asian                               | 33 (2·8)                                   | 29 (2·5)                    | 62 (2·7)                  |
| American Indian or Alaska Native    | 3 (0·3)                                    | 5 (0·4)                     | 8 (0·3)                   |
| Native Hawaiian or Pacific Islander | 2 (0·2)                                    | 2 (0·2)                     | 4 (0·2)                   |
| Other                               | 18 (1·5)                                   | 22 (1·9)                    | 40 (1·7)                  |
| Ethnicity, n (%)                    |                                            |                             |                           |
| Hispanic or Latino                  | 558 (47·5)                                 | 566 (49·5)                  | 1124 (48·5)               |
| Not Hispanic or Latino              | 612 (52·1)                                 | 570 (49·9)                  | 1182 (51·0)               |
| Other                               | 4 (0·3)                                    | 7 (0·6)                     | 11 (0·5)                  |
| Mean weight, kg (SD)                | 81·2 (19·22)                               | 81·8 (19·83)                | 81·5 (19·52)              |
| Body-mass index, kg/m <sup>2</sup>  |                                            |                             |                           |
| Mean (SD)                           | 28·5 (6·06)                                | 28·8 (6·32)                 | 28·6 (6·19)               |
| ≥30, n (%)                          | 416 (35·4)                                 | 400 (35·0)                  | 816 (35·2)                |

\*Population includes participants who were SARS-CoV-2 RT-PCR–negative regardless of serostatus, excluding participants from the initial descriptive assessment.

CAS+IMD=casirivimab and imdevimab. RT-PCR=reverse transcription polymerase chain reaction. SARS-CoV-2=severe acute respiratory syndrome coronavirus 2. SC=subcutaneous. SD=standard deviation.

**Table S3: Proportion of participants who had a SARS-CoV-2–related medically attended visit during the 8-month study\***

|                                                            | <b>CAS+IMD<br/>1200 mg SC<br/>(n=841)</b> | <b>Placebo<br/>(n=842)</b> | <b>Total<br/>(n=1683)</b> |
|------------------------------------------------------------|-------------------------------------------|----------------------------|---------------------------|
| Participants with $\geq 1$ medically attended visit, n (%) | 1 (0·1)                                   | 16 (1·9)                   | 17 (1·0)                  |
| Hospitalization                                            | 0 (0)                                     | 6 (37·5)                   | 6 (35·3)                  |
| Emergency room†                                            | 0 (0)                                     | 4 (25·0)                   | 4 (23·5)                  |
| Urgent care†                                               | 1 (100)                                   | 7 (43·8)                   | 8 (47·1)                  |

\*Population includes participants who were SARS-CoV-2 RT-PCR–negative and seronegative at baseline, excluding participants from the initial descriptive assessment.

†One participant in the placebo group had an emergency room visit and an urgent care visit.

CAS+IMD=casirivimab and imdevimab. RT-PCR=reverse transcription polymerase chain reaction. SARS-CoV-2=severe acute respiratory syndrome coronavirus 2. SC=subcutaneous.

**Table S4: Treatment-emergent adverse events  $\geq 2\%$  in any study group during the 8-month study by baseline serology status\*\*†**

| Participants, n (%)                                         | Combined serostatus               |                     | Seronegative                         |                     | Seropositive                     |                    | Other                           |                   |
|-------------------------------------------------------------|-----------------------------------|---------------------|--------------------------------------|---------------------|----------------------------------|--------------------|---------------------------------|-------------------|
|                                                             | CAS+IMD<br>1200 mg SC<br>(n=1439) | Placebo<br>(n=1428) | CAS+IMD<br>1200 mg<br>SC<br>(n=1028) | Placebo<br>(n=1067) | CAS+IMD<br>1200 mg SC<br>(n=337) | Placebo<br>(n=296) | CAS+IMD<br>1200 mg SC<br>(n=74) | Placebo<br>(n=65) |
| <b>Primary system organ class</b><br>Preferred term         |                                   |                     |                                      |                     |                                  |                    |                                 |                   |
| <b>Infections and infestations</b>                          | 193 (13.4)                        | 322 (22.5)          | 142 (13.8)                           | 270 (25.3)          | 40 (11.9)                        | 42 (14.2)          | 11 (14.9)                       | 10 (15.4)         |
| Asymptomatic COVID-19                                       | 71 (4.9)                          | 119 (8.3)           | 51 (5.0)                             | 94 (8.8)            | 17 (5.0)                         | 22 (7.4)           | 3 (4.1)                         | 3 (4.6)           |
| COVID-19                                                    | 29 (2.0)                          | 149 (10.4)          | 22 (2.1)                             | 138 (12.9)          | 6 (1.8)                          | 9 (3.0)            | 1 (1.4)                         | 2 (3.1)           |
| <b>General disorders and administration site conditions</b> | 104 (7.2)                         | 84 (5.9)            | 77 (7.5)                             | 65 (6.1)            | 17 (5.0)                         | 13 (4.4)           | 10 (13.5)                       | 6 (9.2)           |
| Injection site reaction                                     | 60 (4.2)                          | 26 (1.8)            | 46 (4.5)                             | 21 (2.0)            | 10 (3.0)                         | 3 (1.0)            | 4 (5.4)                         | 2 (3.1)           |
| <b>Respiratory, thoracic, and mediastinal disorders</b>     | 89 (6.2)                          | 68 (4.8)            | 65 (6.3)                             | 54 (5.1)            | 18 (5.3)                         | 6 (2.0)            | 6 (8.1)                         | 8 (12.3)          |
| Cough                                                       | 40 (2.8)                          | 21 (1.5)            | 25 (2.4)                             | 16 (1.5)            | 12 (3.6)                         | 2 (0.7)            | 3 (4.1)                         | 3 (4.6)           |
| Oropharyngeal pain                                          | 29 (2.0)                          | 26 (1.8)            | 19 (1.8)                             | 19 (1.8)            | 7 (2.1)                          | 5 (1.7)            | 3 (4.1)                         | 2 (3.1)           |
| <b>Nervous system disorders</b>                             | 53 (3.7)                          | 78 (5.5)            | 35 (3.4)                             | 61 (5.7)            | 14 (4.2)                         | 10 (3.4)           | 4 (5.4)                         | 7 (10.8)          |
| Headache                                                    | 39 (2.7)                          | 62 (4.3)            | 25 (2.4)                             | 47 (4.4)            | 11 (3.3)                         | 10 (3.4)           | 3 (4.1)                         | 5 (7.7)           |

\*Population includes participants who were SARS-CoV-2 RT-PCR–negative at baseline, including participants from the initial descriptive assessment.

†Serologic testing included anti-spike [S1] IgA, anti-spike [S1] IgG, and anti-nucleocapsid IgG. A participant was categorised at baseline as seronegative if all available serologic tests were negative and as seropositive if any serologic test was positive. Participants that had only borderline serology test results or no data were categorised as “other”.

CAS+IMD=casirivimab and imdevimab. RT-PCR=reverse transcription polymerase chain reaction. SARS-CoV-2=severe acute respiratory syndrome coronavirus 2. SC=subcutaneous.

**Table S5: Serious treatment-emergent adverse events during the 8-month study\*†**

| <b>System organ class</b><br><b>Preferred term –participants, n (%)</b> | <b>CAS+IMD</b><br><b>1200 mg SC</b><br><b>(n=1439)</b> | <b>Placebo</b><br><b>(n=1428)</b> |
|-------------------------------------------------------------------------|--------------------------------------------------------|-----------------------------------|
| Participants with at least one serious TEAE                             | 24 (1·7)                                               | 23 (1·6)                          |
| Infections and infestations                                             | 7 (0·5)                                                | 12 (0·8)                          |
| Pneumonia                                                               | 2 (0·1)                                                | 1 (<0·1)                          |
| Abscess limb                                                            | 1 (<0·1)                                               | 0                                 |
| Appendicitis                                                            | 1 (<0·1)                                               | 2 (0·1)                           |
| Gangrene                                                                | 1 (<0·1)                                               | 0                                 |
| Gastroenteritis                                                         | 1 (<0·1)                                               | 0                                 |
| Osteomyelitis                                                           | 1 (<0·1)                                               | 0                                 |
| Sepsis                                                                  | 1 (<0·1)                                               | 1 (<0·1)                          |
| Soft tissue infection                                                   | 1 (<0·1)                                               | 0                                 |
| COVID-19                                                                | 0                                                      | 5 (0·4)                           |
| COVID-19 pneumonia                                                      | 0                                                      | 3 (0·2)                           |
| Pyelonephritis                                                          | 0                                                      | 1 (<0·1)                          |
| Scrotal abscess                                                         | 0                                                      | 1 (<0·1)                          |
| Injury, poisoning, and procedural complications                         | 7 (0·5)                                                | 3 (0·2)                           |
| Road traffic accident                                                   | 2 (0·1)                                                | 0                                 |
| Ankle fracture                                                          | 1 (<0·1)                                               | 0                                 |
| Burns second degree                                                     | 1 (<0·1)                                               | 0                                 |
| Foot fracture                                                           | 1 (<0·1)                                               | 0                                 |
| Post procedural complication                                            | 1 (<0·1)                                               | 0                                 |
| Post procedural haemorrhage                                             | 1 (<0·1)                                               | 0                                 |
| Post procedural inflammation                                            | 1 (<0·1)                                               | 0                                 |
| Tibia fracture                                                          | 1 (<0·1)                                               | 0                                 |
| Traumatic lung injury                                                   | 1 (<0·1)                                               | 0                                 |
| Gunshot wound                                                           | 0                                                      | 1 (<0·1)                          |
| Humerus fracture                                                        | 0                                                      | 1 (<0·1)                          |
| Soft tissue injury                                                      | 0                                                      | 1 (<0·1)                          |
| Cardiac disorders                                                       | 3 (0·2)                                                | 1 (<0·1)                          |
| Acute myocardial infarction                                             | 2 (0·1)                                                | 0                                 |
| Cardiac failure congestive                                              | 1 (<0·1)                                               | 0                                 |
| Cardio-respiratory arrest                                               | 1 (<0·1)                                               | 0                                 |
| Cardiac arrest                                                          | 0                                                      | 1 (<0·1)                          |
| Nervous system disorders                                                | 2 (0·1)                                                | 1 (<0·1)                          |
| Syncope                                                                 | 1 (<0·1)                                               | 0                                 |

|                                                                       |          |          |
|-----------------------------------------------------------------------|----------|----------|
| Transient ischaemic attack                                            | 1 (<0·1) | 0        |
| Cerebral infarction                                                   | 0        | 1 (<0·1) |
| Pregnancy, puerperium, and perinatal conditions                       | 2 (0·1)  | 2 (0·1)  |
| Abortion spontaneous                                                  | 1 (<0·1) | 2 (0·1)  |
| Pre-eclampsia                                                         | 1 (<0·1) | 0        |
| Gastrointestinal disorders                                            | 1 (<0·1) | 0        |
| Abdominal pain upper                                                  | 1 (<0·1) | 0        |
| Hepatobiliary disorders                                               | 1 (<0·1) | 1 (<0·1) |
| Cholecystitis acute                                                   | 1 (<0·1) | 0        |
| Cholelithiasis                                                        | 0        | 1 (<0·1) |
| Neoplasms benign, malignant, and unspecified (incl. cysts and polyps) | 1 (<0·1) | 1 (<0·1) |
| Cervix carcinoma recurrent                                            | 1 (<0·1) | 0        |
| Invasive ductal breast carcinoma                                      | 0        | 1 (<0·1) |
| Psychiatric disorders                                                 | 1 (<0·1) | 3 (0·2)  |
| Schizophrenia                                                         | 1 (<0·1) | 0        |
| Mania                                                                 | 0        | 1 (<0·1) |
| Suicidal ideation                                                     | 0        | 2 (0·1)  |
| Renal and urinary disorders                                           | 1 (<0·1) | 0        |
| Acute kidney injury                                                   | 1 (<0·1) | 0        |
| Skin and subcutaneous tissue disorders                                | 1 (<0·1) | 0        |
| Diabetic foot                                                         | 1 (<0·1) | 0        |
| Reproductive system and breast disorders                              | 0        | 1 (<0·1) |
| Breast haematoma                                                      | 0        | 1 (<0·1) |
| Vascular disorders                                                    | 0        | 2 (0·1)  |
| Essential hypertension                                                | 0        | 1 (<0·1) |
| Hypertensive urgency                                                  | 0        | 1 (<0·1) |

\*Population includes participants who were SARS-CoV-2 RT-PCR–negative at baseline regardless of serostatus, including participants from the initial descriptive assessment.

CAS+IMD=casirivimab and imdevimab. COVID-19=coronavirus disease 19. SC=subcutaneous.

**Table S6: Population PK predicted concentration of casirivimab and imdevimab combined in serum and estimated 50% neutralizing titer (NT<sub>50</sub>) over time following a single 1200-mg SC dose of CAS+IMD**

| <b>Day</b> | <b>Time<br/>Month</b> | <b>CAS+IMD<br/>Concentration (mg/L)*</b> | <b>Estimated NT<sub>50</sub><sup>*†</sup></b> |
|------------|-----------------------|------------------------------------------|-----------------------------------------------|
| 30         | 1                     | 52.2 (33.7, 77.7)                        | 1:18,418 (1:11890, 1:27415)                   |
| 60         | 2                     | 25.0 (10.6, 46.0)                        | 1:8,821 (1:3740, 1:16230)                     |
| 90         | 3                     | 12.0 (3.32, 28.1)                        | 1:4,234 (1:1171, 1:9914)                      |
| 120        | 4                     | 5.77 (1.01, 17.5)                        | 1:2,036 (1:356, 1:6174)                       |
| 150        | 5                     | 2.73 (0.32, 11.1)                        | 1:963 (1:113, 1:3916)                         |
| 180        | 6                     | 1.29 (0.096, 7.02)                       | 1:455 (1:33.9, 1:2478)                        |
| 210        | 7                     | 0.62 (0.029, 4.45)                       | 1:219 (1:10.2, 1:1570)                        |
| 240        | 8                     | 0.30 (0.009, 2.93)                       | 1:106 (1:3.03, 1:1034)                        |

\*Median (5<sup>th</sup>, 95<sup>th</sup> percentile). †Estimated as concentration of CAS+IMD combined in serum/IC<sub>50</sub> against D614G variant (2.83 ng/mL). See supplemental methods section “estimated 50% neutralization titers” for additional information.

CAS+IMD=casirivimab and imdevimab. IC<sub>50</sub>=half-maximal inhibitory concentration. SC= subcutaneous.

## References

1. O'Brien MP, Forleo-Neto E, Musser BJ, Isa F, Chan KC, Sarkar N, et al. Subcutaneous REGEN-COV antibody combination to prevent Covid-19. *N Engl J Med*. 2021;385:1184–95.
2. Copin R, Baum A, Wloga E, Pascal KE, Giordano S, Fulton BO, et al. The monoclonal antibody combination REGEN-COV protects against SARS-CoV-2 mutational escape in preclinical and human studies. *Cell*. 2021;184:3949–61.e11.
3. Hansen J, Baum A, Pascal KE, Russo V, Giordano S, Wloga E, et al. Studies in humanized mice and convalescent humans yield a SARS-CoV-2 antibody cocktail. *Science*. 2020;369:1010–14.
